# Supplementary material for: Effect of prenatal glucocorticoids and thyroid hormones on developmental plasticity of mitochondrial aerobic metabolism, growth and survival: an experimental test in wild great tits
Source: Oxford University Press journal article supplement (doi:10.1242/jeb.243414), 2022-04-14
Supplement: jeb243414supp.pdf [file jeb243414supp.pdf]

**Table S1. Results of linear mixed model testing the effect of prenatal hormonal treatments on body mass at day 2 post-hatching.** Nest box identity (nestbox) was included as random effect in the model.  $\sigma^2$  = within-group variance;  $\tau_{00}$  = between-group variance. Sample size along with marginal (fixed effects only) and conditional (fixed and random effects)  $R^2$  are presented.

| <b>Body mass day 2</b>       |                  |               |                  |
|------------------------------|------------------|---------------|------------------|
| <i>Predictors</i>            | <i>Estimates</i> | <i>CI</i>     | <i>p</i>         |
| (Intercept)                  | 4.81             | 3.52 – 6.09   | <b>&lt;0.001</b> |
| CORT [Y]                     | -0.30            | -0.73 – 0.12  | 0.165            |
| TH [Y]                       | 0.18             | -0.25 – 0.62  | 0.403            |
| brood size day 2             | -0.02            | -0.12 – 0.09  | 0.756            |
| hatching date                | -0.02            | -0.04 – -0.01 | <b>0.004</b>     |
| <b>Random effects</b>        |                  |               |                  |
| $\sigma^2$                   | 0.27             |               |                  |
| $\tau_{00}$ nestbox          | 0.53             |               |                  |
| N nestbox                    | 52               |               |                  |
| Observations                 | 262              |               |                  |
| Marginal R2 / Conditional R2 | 0.119 / 0.705    |               |                  |

**Table S2. Results of linear mixed models testing the effect of prenatal hormonal treatments on day 7: a. body mass gain (i.e. body mass at day 7 controlled for body mass at day 2); b. wing length (i.e. body size); and c. body condition (i.e. body mass corrected for body size).** Nest box identity (nestbox) was included as random effect in the model.  $\sigma^2$  = within-group variance;  $\tau_{00}$  = between-group variance. Sample size along with marginal (fixed effects only) and conditional (fixed and random effects)  $R^2$  are presented.

| <b>a. Body mass day 7</b>    |                  |              |                  |
|------------------------------|------------------|--------------|------------------|
| <i>Predictors</i>            | <i>Estimates</i> | <i>CI</i>    | <i>p</i>         |
| (Intercept)                  | 6.32             | 4.38 – 8.27  | <b>&lt;0.001</b> |
| CORT [Y]                     | 0.58             | -0.02 – 1.18 | 0.056            |
| TH [Y]                       | -0.27            | -0.88 – 0.35 | 0.391            |
| mass day 2                   | 1.64             | 1.50 – 1.78  | <b>&lt;0.001</b> |
| brood size day 2             | 0.07             | -0.08 – 0.22 | 0.373            |
| hatching date                | -0.01            | -0.03 – 0.01 | 0.400            |
| <b>Random effects</b>        |                  |              |                  |
| $\sigma^2$                   | 0.30             |              |                  |
| $\tau_{00}$ nestbox          | 1.01             |              |                  |
| N nestbox                    | 49               |              |                  |
| Observations                 | 248              |              |                  |
| Marginal R2 / Conditional R2 | 0.623 / 0.914    |              |                  |

  

| <b>b. Wing length day 7</b>  |                  |               |                  |
|------------------------------|------------------|---------------|------------------|
| <i>Predictors</i>            | <i>Estimates</i> | <i>CI</i>     | <i>p</i>         |
| (Intercept)                  | 24.08            | 19.75 – 28.42 | <b>&lt;0.001</b> |
| CORT [Y]                     | -0.60            | -1.98 – 0.78  | 0.393            |
| TH [Y]                       | -0.73            | -2.10 – 0.65  | 0.300            |
| brood size day 2             | 0.17             | -0.20 – 0.53  | 0.377            |
| hatching date                | -0.08            | -0.13 – -0.03 | <b>0.004</b>     |
| <b>Random effects</b>        |                  |               |                  |
| $\sigma^2$                   | 4.83             |               |                  |
| $\tau_{00}$ nestbox          | 4.73             |               |                  |
| N nestbox                    | 49               |               |                  |
| Observations                 | 251              |               |                  |
| Marginal R2 / Conditional R2 | 0.118 / 0.555    |               |                  |

| <b>c.</b>                                            |                  |              |                  |
|------------------------------------------------------|------------------|--------------|------------------|
| <b>Body mass day 7</b>                               |                  |              |                  |
| <i>Predictors</i>                                    | <i>Estimates</i> | <i>CI</i>    | <i>p</i>         |
| (Intercept)                                          | 3.84             | 2.28 – 5.40  | <b>&lt;0.001</b> |
| CORT [Y]                                             | 0.30             | -0.10 – 0.70 | 0.140            |
| TH [Y]                                               | -0.04            | -0.44 – 0.36 | 0.839            |
| wing length day 7                                    | 0.44             | 0.40 – 0.48  | <b>&lt;0.001</b> |
| brood size day 2                                     | -0.06            | -0.17 – 0.04 | 0.233            |
| hatching date                                        | -0.01            | -0.02 – 0.01 | 0.255            |
| <b>Random effects</b>                                |                  |              |                  |
| $\sigma^2$                                           | 0.48             |              |                  |
| $\tau_{00}$ nestbox                                  | 0.37             |              |                  |
| N nestbox                                            | 49               |              |                  |
| Observations                                         | 251              |              |                  |
| Marginal R <sup>2</sup> / Conditional R <sup>2</sup> | 0.708 / 0.835    |              |                  |

**Table S3. Results of linear mixed models testing the effect of prenatal hormonal treatments on day 14: a. body mass gain (i.e. body mass at day 14 controlled for body mass at day 7); b. wing length (i.e. body size); and c. body condition (i.e. body mass corrected for body size).** Nest box identity (nestbox) was included as random effect in the model.  $\sigma^2$  = within-group variance;  $\tau_{00}$  = between-group variance. Sample size along with marginal (fixed effects only) and conditional (fixed and random effects)  $R^2$  are presented.

| <b>a. Body mass day 14</b>   |                  |               |                  |
|------------------------------|------------------|---------------|------------------|
| <i>Predictors</i>            | <i>Estimates</i> | <i>CI</i>     | <i>p</i>         |
| (Intercept)                  | 15.08            | 12.26 – 17.90 | <b>&lt;0.001</b> |
| CORT [Y]                     | 0.24             | -0.54 – 1.02  | 0.552            |
| TH [Y]                       | 0.15             | -0.56 – 0.87  | 0.674            |
| mass day 7                   | 0.52             | 0.42 – 0.61   | <b>&lt;0.001</b> |
| brood size day 2             | -0.15            | -0.36 – 0.07  | 0.177            |
| hatching date                | -0.05            | -0.08 – -0.01 | <b>0.004</b>     |
| <b>Random effects</b>        |                  |               |                  |
| $\sigma^2$                   | 0.61             |               |                  |
| $\tau_{00}$ nestbox          | 1.37             |               |                  |
| N nestbox                    | 41               |               |                  |
| Observations                 | 204              |               |                  |
| Marginal R2 / Conditional R2 | 0.385 / 0.811    |               |                  |

| <b>b. Wing length day 14</b> |                  |               |                  |
|------------------------------|------------------|---------------|------------------|
| <i>Predictors</i>            | <i>Estimates</i> | <i>CI</i>     | <i>p</i>         |
| (Intercept)                  | 58.18            | 52.30 – 64.06 | <b>&lt;0.001</b> |
| CORT [Y]                     | -0.17            | -2.01 – 1.66  | 0.852            |
| TH [Y]                       | -1.13            | -2.87 – 0.61  | 0.204            |
| brood size day 2             | 0.20             | -0.30 – 0.70  | 0.430            |
| hatching date                | -0.14            | -0.21 – -0.07 | <b>&lt;0.001</b> |
| <b>Random effects</b>        |                  |               |                  |
| $\sigma^2$                   | 5.99             |               |                  |
| $\tau_{00}$ nestbox          | 6.99             |               |                  |
| N nestbox                    | 41               |               |                  |
| Observations                 | 204              |               |                  |
| Marginal R2 / Conditional R2 | 0.224 / 0.642    |               |                  |

| <b>c.</b>                                            |                  |                |                  |
|------------------------------------------------------|------------------|----------------|------------------|
| <b>Body mass 14</b>                                  |                  |                |                  |
| <i>Predictors</i>                                    | <i>Estimates</i> | <i>CI</i>      | <i>p</i>         |
| (Intercept)                                          | 10.11            | 6.34 – 13.88   | <b>&lt;0.001</b> |
| CORT [Y]                                             | 0.32             | -0.41 – 1.06   | 0.390            |
| TH [Y]                                               | 0.06             | -0.64 – 0.75   | 0.876            |
| wing length day 14                                   | 0.21             | 0.16 – 0.26    | <b>&lt;0.001</b> |
| brood size day 2                                     | -0.19            | -0.39 – 0.01   | 0.063            |
| hatching date                                        | -0.03            | -0.06 – -0.001 | <b>0.042</b>     |
| <b>Random effects</b>                                |                  |                |                  |
| $\sigma^2$                                           | 0.76             |                |                  |
| $\tau_{00}$ nestbox                                  | 1.18             |                |                  |
| N nestbox                                            | 41               |                |                  |
| Observations                                         | 204              |                |                  |
| Marginal R <sup>2</sup> / Conditional R <sup>2</sup> | 0.339 / 0.740    |                |                  |

**Table S4. Results of linear mixed models testing the effect of prenatal hormonal treatments on juvenile: a. body mass; b. wing length (i.e. body size); and c. body condition (i.e. body mass corrected for body size).** Nest box identity (nestbox) was included as random effect in the model.  $\sigma^2$  = within-group variance;  $\tau_{00}$  = between-group variance. Sample size along with marginal (fixed effects only) and conditional (fixed and random effects)  $R^2$  are presented.

| <b>a.</b>                    |                  |               |                  |
|------------------------------|------------------|---------------|------------------|
| <b>Body mass juvenile</b>    |                  |               |                  |
| <i>Predictors</i>            | <i>Estimates</i> | <i>CI</i>     | <i>p</i>         |
| (Intercept)                  | 18.32            | 17.03 – 19.61 | <b>&lt;0.001</b> |
| sex [M]                      | 0.64             | 0.17 – 1.10   | <b>0.009</b>     |
| CORT [Y]                     | -0.61            | -1.11 – -0.12 | <b>0.019</b>     |
| TH [Y]                       | -0.11            | -0.48 – 0.26  | 0.569            |
| hatching date                | -0.01            | -0.03 – 0.02  | 0.548            |
| sex [M] * CORT [Y]           | 0.89             | 0.29 – 1.49   | <b>0.005</b>     |
| <b>Random effects</b>        |                  |               |                  |
| $\sigma^2$                   | 0.49             |               |                  |
| $\tau_{00}$ nestbox          | 0.11             |               |                  |
| N nestbox                    | 36               |               |                  |
| Observations                 | 98               |               |                  |
| Marginal R2 / Conditional R2 | 0.398 / 0.509    |               |                  |

| <b>b.</b>                    |                  |               |                  |
|------------------------------|------------------|---------------|------------------|
| <b>Wing length juvenile</b>  |                  |               |                  |
| <i>Predictors</i>            | <i>Estimates</i> | <i>CI</i>     | <i>p</i>         |
| (Intercept)                  | 76.59            | 74.15 – 79.02 | <b>&lt;0.001</b> |
| CORT [Y]                     | 0.13             | -0.63 – 0.90  | 0.731            |
| TH [Y]                       | -0.05            | -0.82 – 0.73  | 0.904            |
| sex [M]                      | 2.70             | 2.20 – 3.21   | <b>&lt;0.001</b> |
| hatching date                | -0.01            | -0.06 – 0.03  | 0.508            |
| <b>Random effects</b>        |                  |               |                  |
| $\sigma^2$                   | 1.33             |               |                  |
| $\tau_{00}$ nestbox          | 0.74             |               |                  |
| N nestbox                    | 36               |               |                  |
| Observations                 | 98               |               |                  |
| Marginal R2 / Conditional R2 | 0.471 / 0.660    |               |                  |

| <b>c.</b>                                            |                  |               |              |
|------------------------------------------------------|------------------|---------------|--------------|
| <b>Body mass juvenile</b>                            |                  |               |              |
| <i>Predictors</i>                                    | <i>Estimates</i> | <i>CI</i>     | <i>p</i>     |
| (Intercept)                                          | 12.40            | 3.60 – 21.20  | <b>0.007</b> |
| sex [M]                                              | 0.41             | -0.16 – 0.98  | 0.161        |
| CORT [Y]                                             | -0.64            | -1.13 – -0.14 | <b>0.015</b> |
| TH [Y]                                               | -0.11            | -0.48 – 0.27  | 0.573        |
| wing length juvenile                                 | 0.08             | -0.04 – 0.19  | 0.186        |
| hatching date                                        | -0.01            | -0.03 – 0.02  | 0.620        |
| sex [M] * CORT [Y]                                   | 0.91             | 0.31 – 1.51   | <b>0.004</b> |
| <b>Random effects</b>                                |                  |               |              |
| $\sigma^2$                                           | 0.48             |               |              |
| $\tau_{00}$ nestbox                                  | 0.11             |               |              |
| N nestbox                                            | 36               |               |              |
| Observations                                         | 98               |               |              |
| Marginal R <sup>2</sup> / Conditional R <sup>2</sup> | 0.407 / 0.520    |               |              |
